# Supplementary material for: The International Landscape of Medical Licensing Examinations: A Typology Derived From a Systematic Review
Source: PubMed Central journal article supplement (PMC6186476; doi:10.15171/ijhpm.2018.32), 2018-04-28
Supplement: ijhpm-7-782-s001.pdf [file ijhpm-7-782-s001.pdf]

## Supplementary file 1. Data Extraction Form

|                                                     |  |
|-----------------------------------------------------|--|
| Paper number                                        |  |
| Date of extraction                                  |  |
| Reviewer                                            |  |
| Bibliographic details of study                      |  |
| Purpose of study                                    |  |
| Methodological or Statistical techniques used       |  |
| Population                                          |  |
| Intervention & Setting                              |  |
| Comparison/Main alternative being considered        |  |
| Outcomes/Conclusions                                |  |
| Study design/characteristics                        |  |
| Evidence for <b>Content</b>                         |  |
| Evidence for <b>Response Process</b>                |  |
| Evidence for <b>Internal structure</b>              |  |
| Evidence for <b>Relationship to other variables</b> |  |
| Evidence for <b>Consequences</b>                    |  |
